# Supplementary figures and images for: Speciation Characterization and Environmental Stability of Arsenic in Arsenic-Containing Copper Slag Tailing
Source: Research Square preprint supplement (doi:10.21203/rs.3.rs-1297401/v1), 2022-02-23

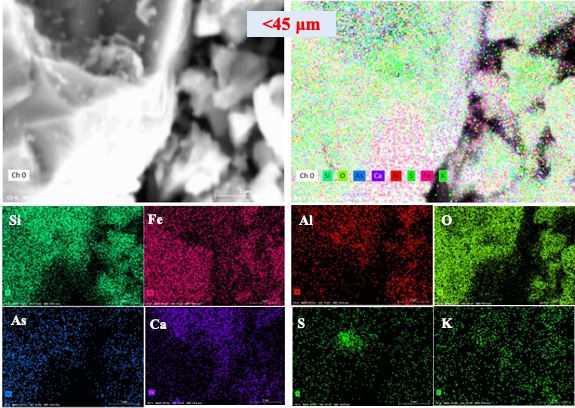

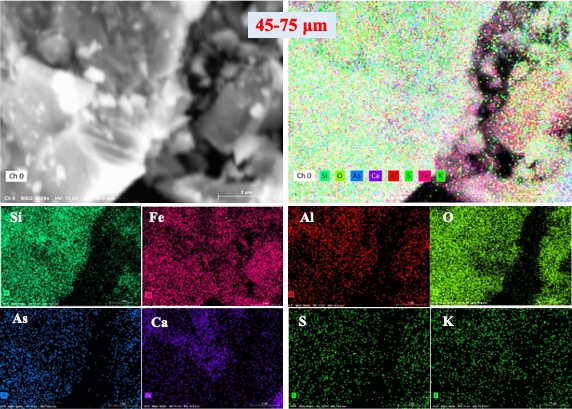

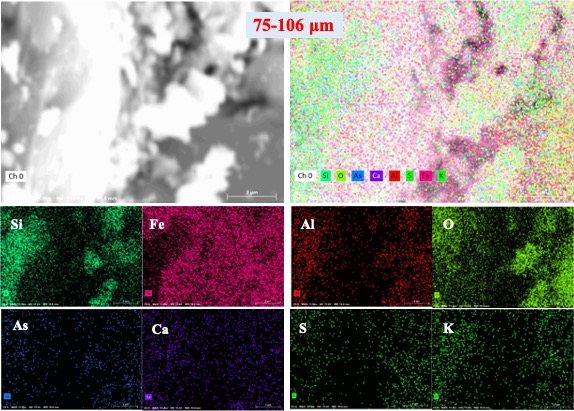

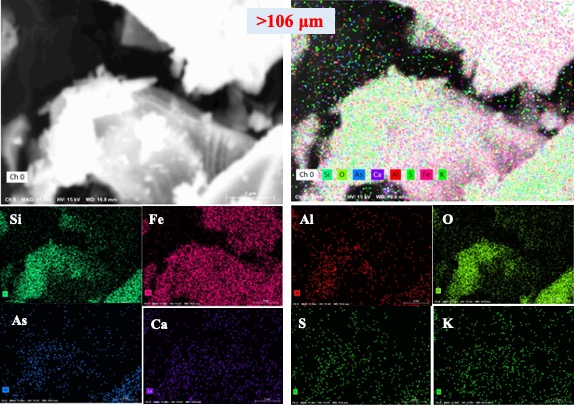


Fig. S1 Two-dimensional distribution of elements in different size fractions of slag tailing.

Supplement: Supplementary file 1 [file 96f1b187b632fcabe050e45f.docx]
